# Supplementary material for: Ecotoxicity of Heteroaggregates of Polystyrene Nanospheres in Chironomidae and Amphibian
Source: Nanomaterials (Basel). 2022 Aug 8;12(15):2730. doi: 10.3390/nano12152730 (PMC9370236; doi:10.3390/nano12152730)
Supplement: Supplementary file 1 [file nanomaterials-12-02730-s001.zip › nanomaterials-1794464-supplementary.pdf]

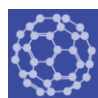

## Supplementary Materials

# Ecotoxicity of Heteroaggregates of Polystyrene Nanospheres in Chironomidae and Amphibian

Florence Mouchet <sup>1,\*</sup>, Laura Rowenczyk <sup>2</sup>, Antoine Minet <sup>1</sup>, Fanny Clergeaud <sup>1</sup>, Jérôme Silvestre <sup>1</sup>, Eric Pinelli <sup>1</sup>, Jessica Ferriol <sup>1</sup>, Joséphine Leflaive <sup>1</sup>, Loïc Ten-Hage <sup>1</sup>, Julien Gigault <sup>3</sup>, Alexandra Ter Halle <sup>2</sup> and Laury Gauthier <sup>1</sup>

<sup>1</sup> Laboratoire d'Ecologie Fonctionnelle et Environnement, UMR 5245 CNRS, Université Paul Sabatier, 31062 Toulouse, France

<sup>2</sup> Laboratoire des Interactions Moléculaires et Réactivité Chimique et Photochimique (IMRCP), UMR CNRS 5623, Université Paul Sabatier, Bâtiment 2R1, 3ème étage, 118, Route de Narbonne, 31062 Toulouse, France

<sup>3</sup> Laboratoire Takuvik, CNRS, Laval University, Avenue de la Médecine, Quebec QC 1045, Canada

\* Correspondence: [florence.mouchet@ensat.fr](mailto:florence.mouchet@ensat.fr)

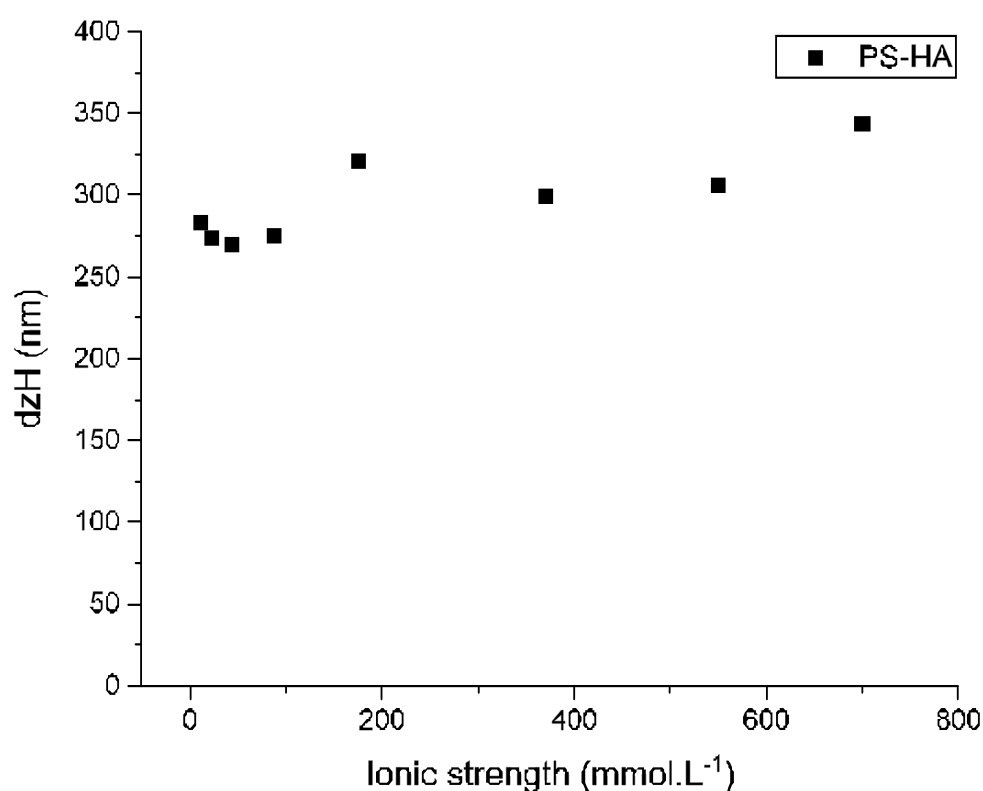

**Figure S1.** Stability of the PS-HA with ionic strength. The PS-HA were initially in water with NaCl ( $I = 700 \text{ mmol}\cdot\text{L}^{-1}$ ). They were diluted by adding deionized water, and DLS measurements were performed in situ. The cumulants and SBL methods showed that the heteroaggregates were stable during dilution.

**Table S1.** Characterization of exposition media prepared with tap water (Ionic strength about 9 mM). Exposition media were prepared with numerous salts dissociated into ions when dissolved in water. Their pH was slightly basic, and their conductivity was above 1 mS/cm and similar. It is worth noting that the ionic strength of the tap water had to be considered in calculating the ionic strength. Thanks to data from “Eau de Paris” (<http://www.eaudeparis.fr/leau-au-quotidien/une-eau-de-qualite/> accessed on 31 October 2018), the ionic strength of the tap water was found to be 9 mmol·L<sup>-1</sup>. This value was added to the media ionic.

|            | T (°C) | pH   | Conductivity<br>(mS/cm) | Ionic strength (I)<br>(mmol·L <sup>-1</sup> ) |
|------------|--------|------|-------------------------|-----------------------------------------------|
| Chironomus | 16.6   | 8.23 | 0.582                   | 8.95 + 9.00 = 17.95                           |
| Amphibian  | 16.1   | 8.05 | 0.897                   | 17.72 + 9.00 = 26.72                          |
